# Supplementary material for: Insulin resistance influences the impact of hypertension on left ventricular diastolic dysfunction in a community sample
Source: PubMed Central journal article supplement (PMC6712340; doi:10.1002/clc.23145), 2019-01-14

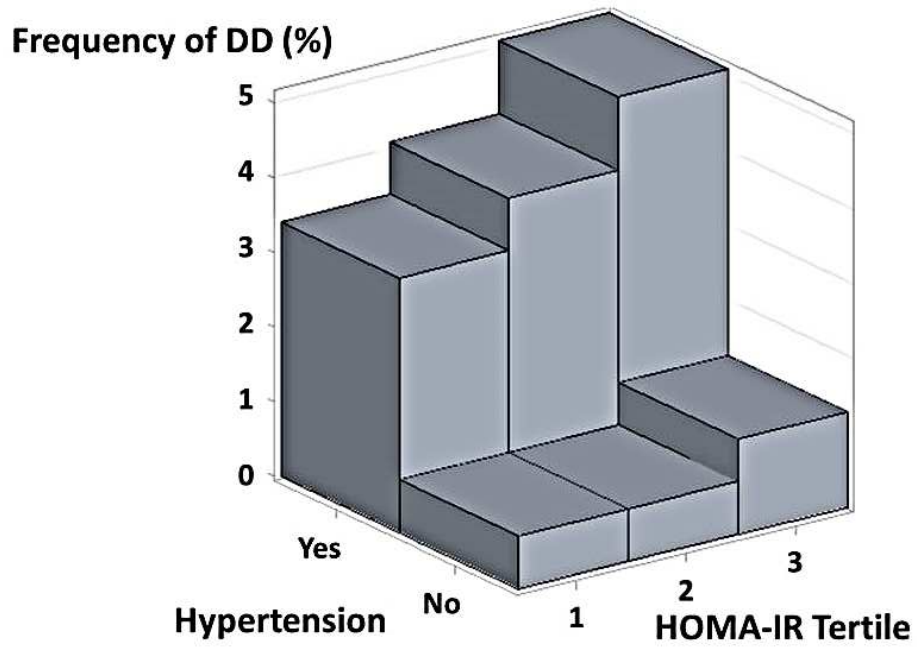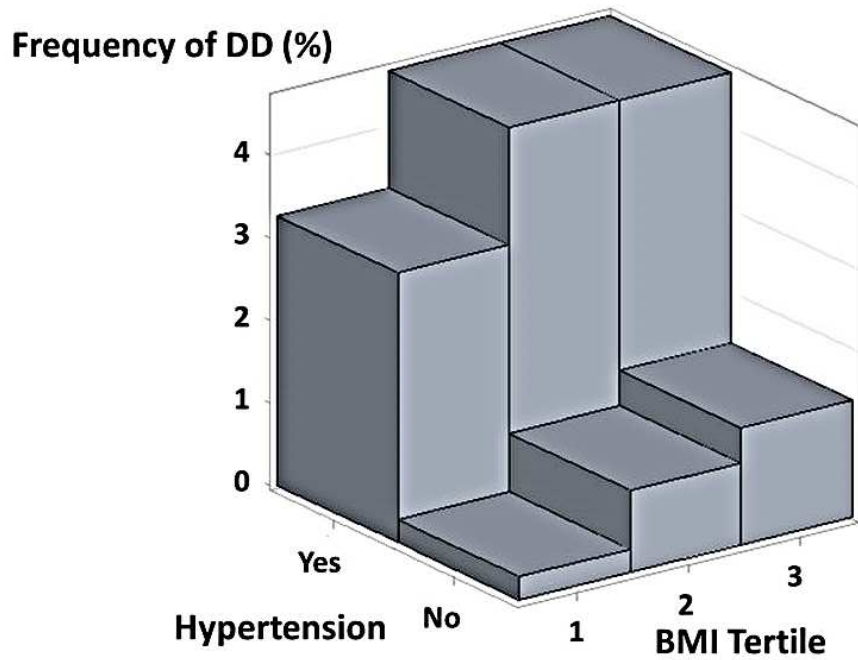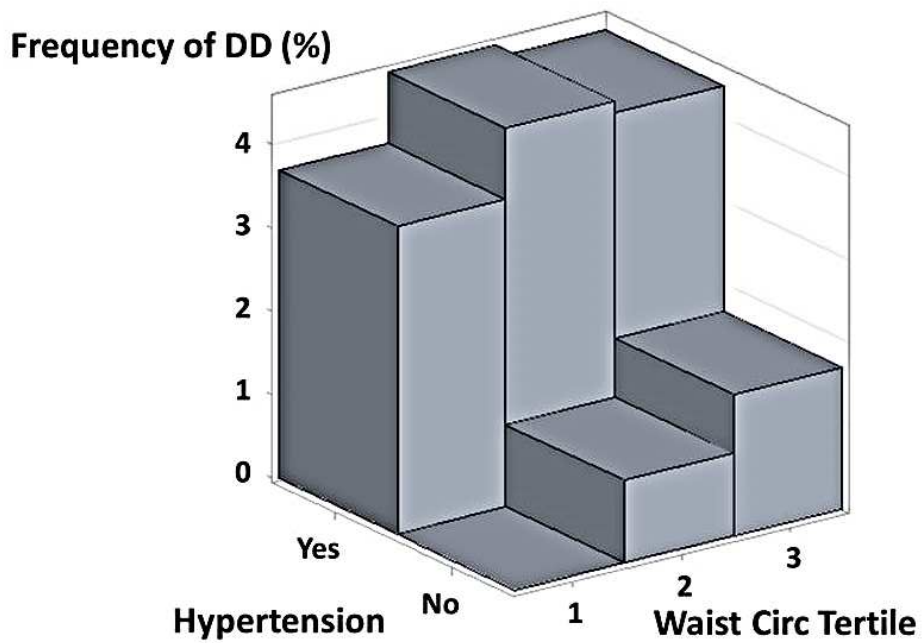

Supplement: CLC-42-305-s001.pdf [file CLC-42-305-s001.pdf]
